# Supplementary material for: Impacts of Landfill Leachate on the Surrounding Environment: A Case Study on Amin Bazar Landfill, Dhaka (Bangladesh)
Source: MDPI journal article supplement (doi:10.3390/soilsystems6040090), 2022-11-29
Supplement: s1 [file s1]

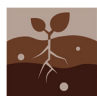

Table S1. Heavy metal(loid)s concentration in all samples.

| Sample ID | Sample Type | Pb<br>mg/L<br>mg/kg | Cd<br>mg/L<br>mg/kg | Cr<br>mg/L<br>mg/kg | Co<br>mg/L<br>mg/kg | Ni<br>mg/L<br>mg/kg | As<br>mg/L<br>mg/kg |
|-----------|-------------|---------------------|---------------------|---------------------|---------------------|---------------------|---------------------|
| 01        | Leachate    | 0.04                | 0.004               | 0.03                | 0.076               | 0.198               | 0.0048              |
|           | Untreated   |                     |                     |                     |                     |                     |                     |
| 02        | Leachate    | 0.06                | 0.002               | 0.0058              | 0.038               | 0.122               | 0.021               |
|           | Treated     |                     |                     |                     |                     |                     |                     |
|           | <b>Mean</b> | 0.05                | 0.003               | 0.0179              | 0.057               | 0.16                | 0.0129              |
|           | <b>SD</b>   | 0.014               | 0.001               | 0.017               | 0.026               | 0.053               | 0.011               |
| 03-01     | SW          | 0.0078              | 0.004               | 0.0064              | 0.026               | 0.082               | 0.005               |
| 03-02     | SW          | 0.02                | 0.002               | 0.124               | 0.022               | 0.043               | 0.0038              |
| 03-03     | SW          | 0.0028              | 0.0016              | 0.0024              | 0.018               | 0.035               | 0.00545             |
|           | <b>Mean</b> | 0.01                | 0.002               | 0.044               | 0.022               | 0.053               | 0.0047              |
|           | <b>SD</b>   | 0.008               | 0.0012              | 0.069               | 0.004               | 0.025               | 0.0008              |
| 04-01     | GW          | 0.0052              | 0.0026              | 0.008               | 0.014               | 0.08                | 0.0033              |
| 04-02     | GW          | 0.0036              | 0.003               | 0.0036              | 0.01                | 0.029               | 0.00265             |
| 04-03     | GW          | 0.0028              | 0.0032              | 0.0042              | 0.005               | 0.03                | 0.00155             |
|           | <b>Mean</b> | 0.003               | 0.002               | 0.0052              | 0.0096              | 0.0463              | 0.0025              |
|           | <b>SD</b>   | 0.001               | 0.0003              | 0.002               | 0.0045              | 0.029               | 0.0008              |
| 05-01     | Soil        | 12                  | 0.11                | 7.1                 | 4.5                 | 15.3                | 0.83                |
| 05-02     | Soil        | 9.25                | 0.03                | 27.6                | 12.35               | 33.1                | 1.905               |
| 05-03     | Soil        | 26.75               | 0.2                 | 108.5               | 12.575              | 38.55               | 2.065               |
|           | <b>Mean</b> | 16                  | 0.11                | 47.73               | 9.808               | 28.98               | 1.6                 |
|           | <b>SD</b>   | 9.41                | 0.085               | 53.61               | 4.59                | 12.15               | 0.67                |
| 06-01     | Plant       | 9                   | 0.4                 | 0.16                | 1.5                 | 4.7                 | 0.21                |
| 06-02     | Plant       | 4                   | 0.225               | 1.5                 | 0.75                | 2.9                 | 0.6275              |
| 06-03     | Plant       | 11                  | 0.575               | 5.125               | 2.925               | 6.7                 | 0.31                |
|           | <b>Mean</b> | 8                   | 0.4                 | 2.26                | 1.725               | 4.76                | 0.382               |
|           | <b>SD</b>   | 3.60                | 0.175               | 2.568               | 1.104               | 1.9                 | 0.21                |

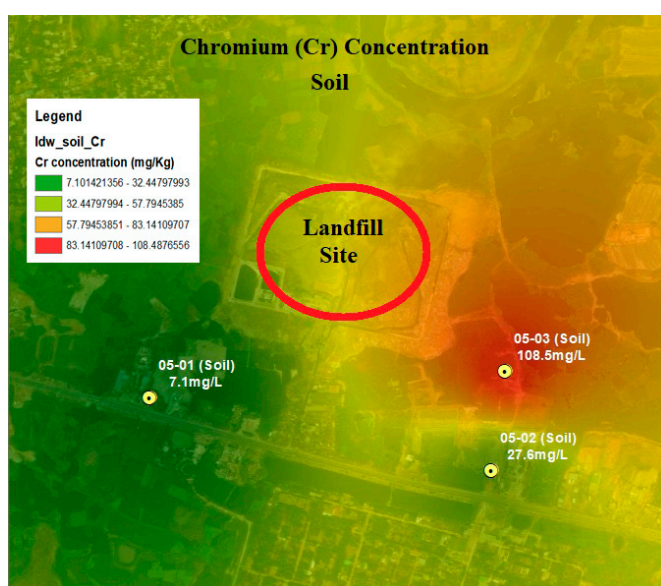

(a)

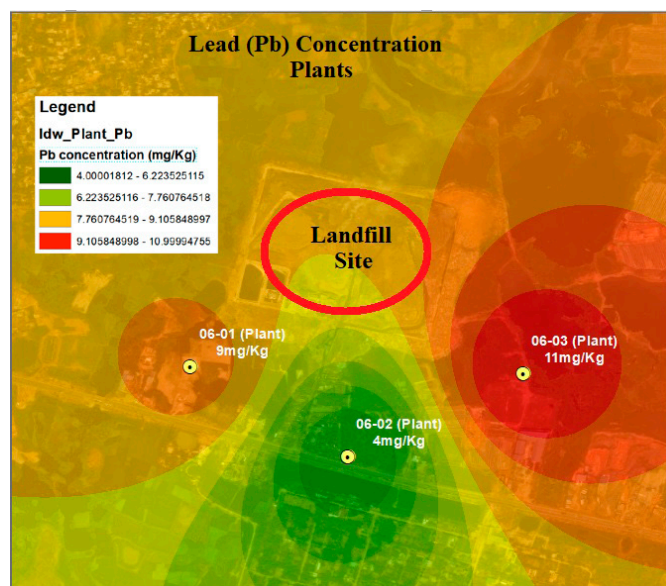

(b)

Figure S1: IWD of (a) Cr concentration in soil samples and (b) Pb concentration in plant samples.
